# Supplementary material
Source: Springer Nature journal article supplement (https://www.springermedizin.de/resource/supplementary/13019_2011_451_MOESM1_ESM.pdf/9638710)
Supplement: MOESM1 [file 9638710]

- ◆ Freedom from all mortality
- Freedom from cardiac mortality
- ▲ Freedom from Valve-conduit mortality

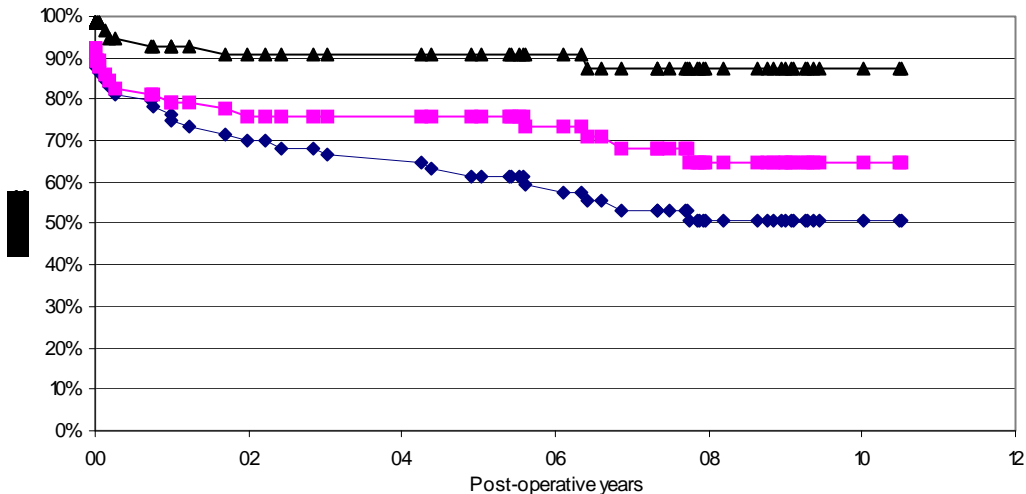

| Years from intervention | 0  | 1  | 2  | 3  | 4  | 5  | 6  | 7  | 8  | 9  | 10 |
|-------------------------|----|----|----|----|----|----|----|----|----|----|----|
| Patients at risk        | 66 | 47 | 43 | 40 | 39 | 36 | 30 | 25 | 15 | 10 | 3  |
